# The evolution of Covid-19 in Italy during the Summer 2020: analysis and interpretation of an unpredicted rest period

Giuseppe De Natale<sup>1,2</sup>, Lorenzo De Natale<sup>3</sup>, Claudia Troise<sup>1,2</sup>, Renato Somma<sup>1,4</sup>, Vito Marchitelli<sup>5</sup>, Antonio Coviello<sup>4</sup>, Karen G. Holmberg<sup>6</sup>

<sup>1</sup> INGV, Osservatorio Vesuviano, 80124 Naples, Italy

<sup>2</sup> CNR-INO, 80078 Pozzuoli (NA), Italy

<sup>3</sup> Faculty di Medicine, Università degli Studi di Napoli “Federico II”, 80131 Naples, Italy

<sup>4</sup> CNR-IRISS, 80134 Naples, Italy

<sup>5</sup> Department of Mobility, Public Works, Ecology, Env, Puglia Region Government, 70100 Bari, Italy

<sup>6</sup> Gallatin School of Individualized Study, New York University, USA

## Abstract

The coronavirus (COVID-19) pandemic was particularly invasive in Italy during the period of March to the end of April 2020, then displayed a significant decrease both in the number of infections and in the seriousness of illness throughout the summer of 2020. In this discussion, we measure the seriousness of the disease by the ratio of Intensive Care Units (ICU) spaces occupied by COVID-19 patients and the number of still Active Cases (AC) each month from April to August 2020. We also use the ratio between the number of Deaths (D) and the number of Active Cases. What clearly emerges, from rigorous statistical analysis, is a progressive decrease of both the ratios, indicating progressive mitigation of the disease. This is particularly evident when comparing March-April with July-August; during the summer period the two ratios have become roughly 18 times lower. We test such sharp decreases against possible bias in counting active cases, and we confirm their statistical significance. We then interpret such evidence in terms of the well-known seasonality of the human immune system and the virus-inactivating effect of stronger UV rays in the summer.

## Introduction

COVID-19 had devastating effects in the months of March-May 2020 in Europe. The CFR (Case Fatality Ratio) in European countries (updated on May 26, 2020) reached peaks close to 19% in France, about 16% in Belgium, and around 14% in Italy, UK and Hungary (Oke and Henegan, 2020). De Natale et al. (2020) discuss the reasons for the high CFR in Italy and these results could potentially be applied to other European countries with very high CFR rates. The main cause, recently confirmed by widespread randomized serological tests in Italy, was in fact the large underestimation of the true number of infections during the peak of pandemic. Recent studies indicate that the true number of infected people in Italy was around 1.5 million people, i.e. about six times the tested confirmed cases (ISTAT, 2020). With such a correction, the Infection Fatality Rate (IFR), which represents the true lethality of this infection, drops to about 2.3. As occurred in Italy, it is likely that other European countries experienced a higher infection rate than was understood at the time. Another problem, experienced in the most severely impacted Italian region Lombardy, was the near-collapse of the health infrastructure accompanied by crisis management errors during the infection peak (De Natale et al., 2020). Lombardy had the highest CFR in Italy, at close to 20%. Other countries with very high CFR likely had similar contexts. It is clearly evidenced that countries with a very strong health system, like Germany, are characterised by much lower CFR (Oke and Henegan, 2020).

Starting in May 2020, COVID-19 seemed to lose much of its severity in Italy. This was very clearly evidenced to medical staff with direct experience with patients in the main hospitals and raised lively debates in Italy that were reported (besides Italian media) also by International press agencies (Reuters, 2020). Such limited, clinical observations raised political-social discussions about the

NOTE: This preprint reports new research that has not been certified by peer review and should not be used to guide clinical practice.

54 need to continue strict containment measures. The evolution of the infection transfers and  
55 consequent illnesses during the summer and after the relaxation of the lockdown and other  
56 containment measures was far milder than expected by epidemiological forecasts (Vespignani et al.,  
57 2020; Vollmer et al., 2020). In this paper, we statistically analyse data of ICU occupation and  
58 deaths due to COVID-19 as related to the number of active cases from the end of March to August.  
59 When rigorously tested, the ratios of ICU occupation to active cases and the ratios of deaths to  
60 active cases show significant changes, thus indicating a change in the evolution of the illness from  
61 spring to summer 2020. The likely implications of such changes are then interpreted and discussed,  
62 taking into account the possible factors affecting the illness: weakening of the virus, counting bias,  
63 and seasonal effects. The results and interpretation are then discussed in light of a possible forecast  
64 of what kind of evolution we could expect in the coming months (Autumn-Winter 2020-2021).  
65 Finally, we discuss the implications of these observations, made in Italy, for the more general  
66 worldwide situation.

67

## 68 **Data analysis**

69

70 We study the global, clinical evolution of COVID-19 in Italy using the data of ICU occupation  
71 numbers, deaths, and active cases in different periods. As De Natale et al. (2020) point out, ICU  
72 numbers and deaths are rather robust data whereas recording of active cases can be strongly biased  
73 by heterogeneous testing, loss of asymptomatic cases, etc. Recently, the first results of a massive  
74 testing campaign to randomly check the percentage of people expressing antibodies to SARS-CoV-  
75 2 were released (ISTAT report, 2020). Such tests confirm, as first hypothesized by De Natale et al.  
76 (2020), that the number of infected people was about six times larger than indicated by official  
77 tests, reaching about 1.5 million people (instead of about 250.000 officially tested positive). In the  
78 following analyses, we first assume that such high underestimation of active cases has been almost  
79 constant during the analysed period; then, we test our results with respect to the maximum bias  
80 implied by such an underestimation. Data on active cases, ICU occupation numbers, and deaths in  
81 Italy are from the Department of Italian Civil Protection Repository (2020). Here, we report the  
82 time evolution of the ratio between the number of people in ICU and the total number of ‘active’  
83 cases (i.e., total less recovered and deaths, at that time), indicated by ICU/AC.

84 In order to make our estimates more robust, we choose to consider another important and robust  
85 indicator: the number of deaths. We therefore also use the ratio between the number of deaths and  
86 the number of active cases, indicated as D/AC. In order to get more accurate estimates, we also  
87 considered the average time lag from COVID-19 confirmation (the actual data on active infection  
88 we have) and the ICU admission as from COVID-19 confirmation to death. According to Wilson et  
89 al. (2020), the average time lag between infection confirmation and ICU admission is 6 days  
90 whereas the average time lag between infection confirmation and death is 13 days. For this reason,  
91 we shift the median day in which we compute the active cases to 6 days before the median day of  
92 the ICU number computation; we accordingly shift the median day to compute the number of  
93 deaths to 7 days after the ICU median day (so that there are 13 days between the days of active  
94 cases computation and the corresponding days of deaths computation). As April 3, 2020 was the  
95 day of maximum ICU occupation in Italy for COVID-19 cases we used the third day of each month,  
96 from April to August, as the median day to consider ICU occupation numbers. The median days for  
97 considering active cases and deaths are chosen accordingly with the described shifts: so that for  
98 active cases we take the 27th or 28th of the month before (depending if it has 30 or 31 days), and  
99 for deaths we take the 10<sup>th</sup> of each month considered. In order to obtain more robust estimates of  
100 the various data, we choose to average the data during 7 days around each median day (considering  
101 also 3 days before and 3 days after the median day). We then computed the two quantities -  
102 ICU/AC and D/AC - as the respective averages for each month. The results, for months from April  
103 to August, are reported in Table1 and Figure1. The data in Figure 1 show the statistical  
104 uncertainties at 95% (2 standard deviations) and indicate that both the ratios sharply decrease, with

105 decreasing values clearly separated, well above the statistical uncertainty. Another way to look at  
106 such marked change is to consider the ratios of ICU/AC and D/AC computed for April to each one  
107 of the following months.

108 The computed values of such ratios are reported in Table 2, and shown in Fig.2.

109 As is clear, both the ratios progressively and rapidly increase: from April to June, the relative ratio  
110  $(ICU/CA)_{April}/(ICU/CA)_{June}$  increases of a factor 7.9, and the relative ratios  $(D/CA)_{April}/(D/CA)_{June}$   
111 of a factor 6.2; from April to August, the relative ratio  $(ICU/CA)_{April}/(ICU/CA)_{August}$  increases of a  
112 factor 17.6 and the relative ratio  $(D/CA)_{April}/(D/CA)_{August}$  of a factor 16.7.

113 These increases are exceptionally marked. Assuming the problems of estimating the true number of  
114 active cases are constant in time they unequivocally indicate that the illness became progressively  
115 milder during the summer months. The next step, however, is to consider the maximum possible  
116 bias due to heterogeneity in the counting procedures of infected people. As we said, we are now  
117 able to consider the massive underestimation of infection rates that occurred in Italy in the first  
118 months of the pandemic; this error indicates a factor of six more people infected than officially  
119 tested positive (ISTAT report, 2020). Then, in order to compute the maximum bias such a  
120 fluctuating underestimation could imply in our computations we assume that all of the  
121 underestimation occurred in the months of March-April and that in the last summer months we  
122 succeeded in testing all COVID-19 positive cases. Such an assumption divides the March-April  
123 ratios (ICU/AC and D/AC) by a factor 6 to test the obtained values against the values computed for  
124 August (with data from July-August).

125 We then performed a rigorous test of hypothesis to determine if the observed increase of the ratios  
126 in August, with respect to the ratios in April though decreased of a factor 6, is significant. We  
127 applied the well-known Student's test (Spiegel, 1992).

128 The Student's test starts by assuming the following formula for the t-variable (Spiegel, 1992):

129

130 
$$t = \frac{(\bar{X}_1 - \bar{X}_2) - (\mu_1 - \mu_2)}{\sqrt{\frac{1}{n}(s_1^2 + s_2^2)}} \quad [1]$$

131

132 where:  $\bar{X}_1$  and  $\bar{X}_2$  are the average values of ICU/AC (or D/AC) for April and August respectively,  
133 and  $s_1^2$  and  $s_2^2$  are the respective variances as computed from the samples, n is the number of  
134 samples. The number of degrees of freedom is  $14-2=12$  (14 is the cumulative number of the two  
135 samples tested). In the assumption of the null hypothesis,  $\mu_1$  and  $\mu_2$ , the true average values of the  
136 two samples are equal, and the value of the t-variable can be tested with respect to the Student's  
137 distribution. For our data, the values result  $t=9.2$  for the ratios ICU/AC, and  $t=6.3$  for the ratios  
138 D/AC, which are both largely out of 99.99% probability limits for the Student's distribution, out of  
139 the smallest limits shown in the tables. So, we can very confidently assess that the decrease of the  
140 ratios ICU/AC and D/AC, from April to August, is significant for both the variables, even if the  
141 maximum bias due to infection counting procedures is assumed, with less than 0.01% probability of  
142 being wrong.

143

## 144 Discussion and Conclusions

145

146 Interpreting the very clear evidence that the disease has become progressively less severe,  
147 particularly in July-August, is not as simple as it would appear. The simplest explanation could be  
148 that the virus itself, which is continuously mutating and adapting to the host (Geoghegan et al.,  
149 2018), lost much of its lethality. With COVID-19, however, we should consider that the severity of  
150 the disease is mostly determined by the response of the human immune system (Song et al., 2020).  
151 The scientific literature currently provides no clear evidence for the virus becoming substantially  
152 mutated and less aggressive. There is evidence for some mutations which actually made the disease  
153 less severe (Barnaby et al., 2020; Benedetti et al., 2020); however, there is no indication that such  
154 mutations currently have a large diffusion (or have increased compared to past months) in order to

155 significantly mitigate the disease. Hence, the hypothesis that the observed mitigation is due to the  
156 large diffusion of a significant virus mutation lacks scientific basis. It is well known that infectious  
157 diseases (Fishman, 2007) as well as auto-immune diseases are characterized by an evident  
158 seasonality (Iikuni et al., 2007; Moltchanova et al., 2009). The main reason for this appears to be  
159 the seasonal variation of the human immune system response, which has been assessed even in  
160 terms of gene expression (Dopico et al., 2015). In particular, during the summer the immune system  
161 response is more effective and less inflammatory. It is proven that during European winters the  
162 human immune system has a marked pro-inflammatory character, with increased levels of soluble  
163 Il-6 receptor and C reactive protein (Dopico et al., 2015). An inflammatory response by the immune  
164 system, with cytokine storms, has been recognised as the main factor leading to lung and/or other  
165 organs failure and death (e.g. Song et al., 2020).

166 Hence, besides widespread evidence that almost all the flu-like epidemics are strongly dampened  
167 during the summer, there is a very fundamental reason because this is even more so in the case of  
168 COVID-19: in the acute phase, COVID-19 behaves like an autoimmune syndrome and so is  
169 particularly sensitive to the seasonality of the immune response (Dopico et al., 2015; Iikuni et al.,  
170 2007). Other researchers previously noted some seasonal/climate effects (e.g. Scafetta, 2020;  
171 Carleton and Meng, 2020). In addition, it has been proven the summer sunlight rapidly inactivates  
172 Sars-Cov-2 (Ratnesar-Shumate et al., 2020).

173 It is important to highlight that other explanations, based on the possible bias due to inhomogeneous  
174 counting and/or mean age of the infected people in the different periods, as often claimed also on  
175 the basis of a relatively younger age inferred for recently recorded infections (ISS, 2020), do not  
176 appear to be sufficient to explain the significant decrease of the ICU/AC and D/AC in the summer  
177 months. In addition to our demonstration here relative to the possible bias of inhomogeneous  
178 counting, there is compelling evidence (Davies et al., 2020) that susceptibility to the virus of  
179 population older than 20 years is more than double with respect to younger population. Such  
180 evidence makes obviously very unlikely to imagine that only very young people in Italy are being  
181 infected, and such infection does not spread also into the older population. The most likely  
182 explanation of the inferred lower mean age of recent infections is that, actually, due to the  
183 predominance of rather asymptomatic cases, the testing is mostly operated to control young people  
184 coming back from summer vacations. Then, a very strong decrease of the seriousness of the disease  
185 in the summer months appears the only realistic explanation of data.

186 What we have described in the Italian case seems to also be able to explain the comparatively low  
187 lethality of the virus in recent months observed even in countries experiencing a very large number  
188 of infections. Countries like the USA, India, Brazil, and almost all the South American and North  
189 African countries, in which epidemics are active, are experiencing much lower CFR (Case Fatality  
190 Rates) compared to what European countries experienced in the spring of 2020 (Oke and Henegan,  
191 2020). Among them, the rate (CFR=0.8) in Israel is extremely low. Except in few cases (like Israel,  
192 for instance) it is not probable that all of these countries are recording the real number of infection  
193 cases with much higher precision than the European countries. Our conclusions also validate  
194 previous observations, made on Covid-19 worldwide, which already noted, even without a clear  
195 explanation, that the evolution of Covid-19 was more mitigated in countries characterized by milder  
196 climate (Scafetta, 2020; Carlton and Meng, 2020; Sajadi et al., 2020; Ficetola and Rubolini, 2020).

197 The largely mitigated effect of COVID-19 epidemics in Italy, despite the acute situation in the  
198 months of March-April (De Natale et al., 2020), strongly validates its management of the epidemics  
199 and the Italian lockdown strategy. We should note, in fact, that just after the first reopening, in the  
200 middle of May 2020, epidemiological studies predicted a very large increase of infections, severe  
201 cases, and deaths (Vespignani et al., 2020; Vollmer et al., 2020). Instead, despite the complete re-  
202 openings of June 3, 2020, such dire forecasts have been completely discounted, confirming the  
203 appropriateness of the response and progression from complete lockdown to gradual and then  
204 complete re-opening.

205 As we conclude here, the recent mitigation of the illness is mostly due to the seasonality of immune  
206 response, which is more effective and less inflammatory in the summer, combined with the strongly  
207 germicidal power of the summer sun's UV rays. It remains to be seen what the practical  
208 implications are for future procedures in order to avoid new epidemic waves. Obviously, despite  
209 several media (and some doctors with direct clinical experience) claims that the virus has lost  
210 power, if the illness mitigation is only attributable to the summer season we should be very careful  
211 to continue the 'mild' actions of containment (social distancing, face masks in close environments,  
212 etc.) in order to avoid, in autumn and winter, the possible escalation of epidemics with renewed  
213 need for partial or total lockdowns. It is also possible that, superimposed on the seasonal effects,  
214 there is also a weakening of the virus due to natural mutations and adaptations to the host; however,  
215 we have no clear evidence for this in scientific literature. An eventual weakening of the SARS-  
216 CoV-2 virus may be evident in autumn 2020, when the concomitant seasonal effect will no longer  
217 apply. Before then, it will be good practice to maintain all the precautions to contain the epidemics.

218

## 219 **References**

220

221 Young, B.E.; Fong, S.W; Chan; Y-H; Mak,T-M.; Ang, L.W.; Anderson, D.E.; Lee, C.Y-P.; Amrun,  
222 S.N.; Lee, B.;Goh, Y.S.; Su, Y.C.F.; E Wei, W.E.; Kalimuddin, S., Chai, L.Y.A.; Pada, S.; Tan,  
223 S.Y.; Sun, L.; Parthasarathy, P.; Chen, Y.Y.C.; Barkham, T.; Lin, R.T.P.; Maurer-Stroh, S. ; Leo,Y-  
224 S.; Wang, L-F.; Renia, L.; Lee, V.J.; Smith, G.J.D.; Lye, D.C.; Ng, L.F.N.. Effects of a major  
225 deletion in the SARS-CoV-2 genome on the severity of infection and the inflammatory response: an  
226 observational cohort study. *The Lancet* **2020**.DOI: 10.1016/S0140-6736(20)31757-8.

227

228 Benedetti, F.; Snyder, G.; Giovanetti, M.; Angeletti, S.; Gallo, R.; Ciccozzi, M.; Zella, D.  
229 Emerging of a SARS-CoV-2 viral strain with a deletion in nsp1. **2020** 10.21203/rs.3.rs-62592/v1  
230 (preprint).

231

232 Carleton, T.; Meng, K.C. Causal empirical estimates suggest COVID-19 transmission rates are  
233 highly seasonal, medRxiv, **2020** doi: <https://doi.org/10.1101/2020.03.26.20044420>

234

235 Davies, N.G.; Klepac, P.; Liu, Y.; Prem, K.; Jit, M.; CMMID COVID-19 working group, Eggo, R.,  
236 M.Age-dependent effects in the transmission and control of COVID-19 epidemics. *Nat Med* **2020**,  
237 **26**,1205–1211 <https://doi.org/10.1038/s41591-020-0962-9>

238

239 De Natale, G.; Ricciardi, V.; De Luca, G.; De Natale, D.; Di Meglio, G.; Ferragamo, A.;  
240 Marchitelli, V.; Piccolo, A.; Scala, A.; Somma, R.; Spina, E.; Troise, C. The COVID-19 Infection  
241 in Italy: A Statistical Study of an Abnormally Severe Disease.*J. Clin. Med.* **2020**, *9*, 1564.

242

243 Department of Italian Civil Protection Repository. Available  
244 online: [http://www.protezionecivile.gov.it/attivita-rischi/rischio-](http://www.protezionecivile.gov.it/attivita-rischi/rischio-sanitario/emergenze/coronavirus)  
245 [sanitario/emergenze/coronavirus](http://www.protezionecivile.gov.it/attivita-rischi/rischio-sanitario/emergenze/coronavirus) (accessed on 4 August 2020).

246

247 Dopico,X.C.; Evangelou,M.; Ferreira, R.C.; Guo, H.; Pekalski, M.L.; Smyth, D.J.; Cooper, N.;  
248 Burren, O.S.; Fulford, A.J.; Hennig, B.J.; Prentice, A.M.; Ziegler, A-G.; Bonifacio, E.; Wallace,  
249 C.; Todd, J.A., Widespread seasonal gene expression reveals annual differences in human immunity  
250 and physiology. *Nat Commun* **2015**, *6*, 7000. <https://doi.org/10.1038/ncomms8000>.

251

252 Ficetola, G.F.; Rubolini, D. Climate affects global patterns of COVID-19 early outbreak dynamics,  
253 medRxiv, 2020; doi: <https://doi.org/10.1101/2020.03.23.20040501>

254

255 Fisman, D. N. Seasonality of infectious diseases. *Annu. Rev. Public Health* **2007**, *28*, 127–143

- 256  
257 Geoghegan, J.L.; Holmes, E.C. The phylogenomics of evolving virus virulence. *Nat Rev Genet*  
258 **2018**, 19, 756–769. <https://doi.org/10.1038/s41576-018-0055-5>  
259
- 260 Iikuni, N.; Nakajima, A.; Inoue, E.; Tanaka, E.; Okamoto, H.; Hara, M.; Tomatsu, T.; Kamatani, N.;  
261 Yamanaka, H. What's in season for rheumatoid arthritis patients? Seasonal fluctuations in disease  
262 activity. *Rheumatology* **2007**, 46, 846–848. doi: 10.1093/rheumatology/ke1414  
263
- 264 ISS Epidemia COVID-19 published August 18, **2020** pp.22 Available online:  
265 [https://www.epicentro.iss.it/coronavirus/bollettino/Bollettino-sorveglianza-integrata-COVID-](https://www.epicentro.iss.it/coronavirus/bollettino/Bollettino-sorveglianza-integrata-COVID-19-18-agosto-2020.pdf)  
266 [19-18-agosto-2020.pdf](https://www.epicentro.iss.it/coronavirus/bollettino/Bollettino-sorveglianza-integrata-COVID-19-18-agosto-2020.pdf) (In Italian, accessed on August 28, 2020)  
267
- 268 ISTAT Report, Primi risultati sull'indagine di sieroprevalenza sul Sars-Cov-2. **2020**. Available  
269 online: <https://www.istat.it/it/files/2020/08/ReportPrimiRisultatiIndagineSiero.pdf> (In Italian,  
270 accessed on August 3, 2020)  
271
- 272 Moltchanova, E. V.; Schreier, N.; Lammi, N.; Karvonen, M. Seasonal variation of diagnosis of  
273 Type 1 diabetes mellitus in children worldwide. *Diabet. Med.* **2009**, 26, 673–678.  
274
- 275 Oke, J.; Heneghan, C. Global COVID-19 Case Fatality Rates; Nuffield Department of Primary Care  
276 Health Sciences: Oxford, UK, **2020**; Available online: [https://www.cebm.net/global-COVID-19-](https://www.cebm.net/global-COVID-19-case-fatality-rates/)  
277 [case-fatality-rates/](https://www.cebm.net/global-COVID-19-case-fatality-rates/) (accessed on 25 August 2020).  
278
- 279 Reuters. New coronavirus losing potency, top Italian doctor says, Thomson Reuters, World News  
280 May 31, 2020 Available online: [https://www.reuters.com/article/us-health-coronavirus-italy-](https://www.reuters.com/article/us-health-coronavirus-italy-virus/new-coronavirus-losing-potency-top-italian-doctor-says-idUSKBN23700Q)  
281 [virus/new-coronavirus-losing-potency-top-italian-doctor-says-idUSKBN23700Q](https://www.reuters.com/article/us-health-coronavirus-italy-virus/new-coronavirus-losing-potency-top-italian-doctor-says-idUSKBN23700Q) (accessed on  
282 August 28, 2020).  
283
- 284 Ratnesar-Shumate, S.; Williams, G.; Green, B.; Krause, M.; Holland, B.; Wood, S.; Bohannon, J.;  
285 Boydston, J.; Freeburger, D.; Hooper, I.; Beck, K.; Yeager, J.; Altamura, L.A.; Biryukov, J.; Yolitz,  
286 J.; Schuit, M.; Wahl, V.; Hevey, M.; Dabisch, P. Simulated Sunlight Rapidly Inactivates SARS-  
287 CoV-2 on Surfaces, *The Journal of Infectious Diseases*, **2020**, 222, 2, 15, 214–222,  
288 <https://doi.org/10.1093/infdis/jiaa274>  
289
- 290 Sajadi, M. M.; Habibzadeh, P.; Vintzileos, A.; Shokouhi, S.; Miralles-Wilhelm, F.; Amoroso, A.  
291 Temperature, Humidity, and Latitude Analysis to Estimate Potential Spread and Seasonality of  
292 Coronavirus Disease 2019 (COVID-19). *JAMA Netw. Open.* **2020**; 3, 6:e2011834.  
293 doi:10.1001/jamanetworkopen.2020.11834  
294
- 295 Scafetta, N. Distribution of the SARS-CoV-2 Pandemic and Its Monthly Forecast Based on  
296 Seasonal Climate Patterns. *Int. J. Environ. Res. Public Health*, **2020**, 17, 3493.  
297
- 298 Song, P.; Li, W.; Xie, J.; Hou, Y.; You, C. Cytokine storm induced by sars-cov-2. *Clin. Chim. Acta*  
299 **2020**, 509, 280–287.  
300
- 301 Spiegel, M. R. *Theory and Problems of Probability and Statistics*, New York: McGraw-Hill, **1992**,  
302 pp. 116-117  
303
- 304 Vespignani et al., 2020. Available online: Il Sole 24 Ore Infodata:  
305 [https://www.infodata.ilssole24ore.com/2020/05/24/covid-19-modeling-italy-quattro-scenari-](https://www.infodata.ilssole24ore.com/2020/05/24/covid-19-modeling-italy-quattro-scenari-prevedere-contagio/)  
306 [prevedere-contagio/](https://www.infodata.ilssole24ore.com/2020/05/24/covid-19-modeling-italy-quattro-scenari-prevedere-contagio/) (accessed on June 1, 2020).

307

308 Vollmer, M.A.C et al. Report 20: Using mobility to estimate the transmission intensity of COVID-  
309 19 in Italy: A subnational analysis with future scenarios Technical Report; Imperial College  
310 COVID-19 Response Team: London, UK, 2020. Available online: [https://www.imperial.ac.uk/mrc-](https://www.imperial.ac.uk/mrc-global-infectious-disease-analysis/covid-19/report-20-italy/)  
311 [global-infectious-disease-analysis/covid-19/report-20-italy/](https://www.imperial.ac.uk/mrc-global-infectious-disease-analysis/covid-19/report-20-italy/) (accessed on August 28, 2020)

312

313 WHO (World Health Organization). Rolling Updates on Coronavirus Disease (COVID-19); WHO:  
314 Geneva, Switzerland, 2020. Available online: [https://www.who.int/emergencies/diseases/novel-](https://www.who.int/emergencies/diseases/novel-coronavirus-2019?gclid=Cj0KQCQjw-af6BRC5ARIsAALPIIXu7eg96lFx3xa-l_DLkvSmCgRFGfB9FKIE6J8oLurUuiX80JiS_5kaAqZGEALw_wcB)  
315 [coronavirus-2019?gclid=Cj0KQCQjw-af6BRC5ARIsAALPIIXu7eg96lFx3xa-](https://www.who.int/emergencies/diseases/novel-coronavirus-2019?gclid=Cj0KQCQjw-af6BRC5ARIsAALPIIXu7eg96lFx3xa-l_DLkvSmCgRFGfB9FKIE6J8oLurUuiX80JiS_5kaAqZGEALw_wcB)  
316 [l\\_DLkvSmCgRFGfB9FKIE6J8oLurUuiX80JiS\\_5kaAqZGEALw\\_wcB](https://www.who.int/emergencies/diseases/novel-coronavirus-2019?gclid=Cj0KQCQjw-af6BRC5ARIsAALPIIXu7eg96lFx3xa-l_DLkvSmCgRFGfB9FKIE6J8oLurUuiX80JiS_5kaAqZGEALw_wcB) (accessed on August 28,  
317 2020)

318

319 Wilson, N.; Kvalsvig, A.; Barnard, L.; Baker, M.G. Case-Fatality Risk Estimates for COVID-19  
320 Calculated by Using a Lag Time for Fatality. *Emerg. Infect. Dis.* 2020, 26(6):1339-1441.  
321 <https://dx.doi.org/10.3201/eid2606.200320>

322

323

## 324 TABLES

325

|               | <b>Ratio ICU/AC</b> | <b>Ratio D/AC</b> |
|---------------|---------------------|-------------------|
| <b>April</b>  | 0.0593 +/- 0.0068   | 0.0083 +/- 0.0012 |
| <b>May</b>    | 0.0144 +/- 0.0008   | 0.0019 +/- 0.0008 |
| <b>June</b>   | 0.0076 +/- 0.0016   | 0.0013 +/- 0.0002 |
| <b>July</b>   | 0.0046 +/- 0.0004   | 0.0009 +/- 0.0001 |
| <b>August</b> | 0.00334 +/- 0.00006 | 0.0005 +/- 0.0002 |

326

327 **Table 1.** Ratios ICU/AC and D/AC. Indicated uncertainties are statistical errors computed at 95%  
328 probability level ( $2\sigma$ ).

329

330

|                     | <b>Relative Ratio ICU/AC</b> | <b>Relative Ratio D/AC</b> |
|---------------------|------------------------------|----------------------------|
| <b>April/May</b>    | 4.11 +/- 0.54                | 4.37 +/- 0.84              |
| <b>April/June</b>   | 7.8 +/- 1.4                  | 6.2 +/- 1.3                |
| <b>April/July</b>   | 12.7 +/- 1.9                 | 9.3 +/- 1.8                |
| <b>April/August</b> | 17.8 +/- 2.1                 | 15.8 +/- 3.5               |

331

332 **Table 2.** Relative ratios ICU/AC and D/AC between April and following months. Indicated  
333 uncertainties are statistical errors computed at 95% probability level ( $2\sigma$ ).

333

334  
335 **FIGURES**

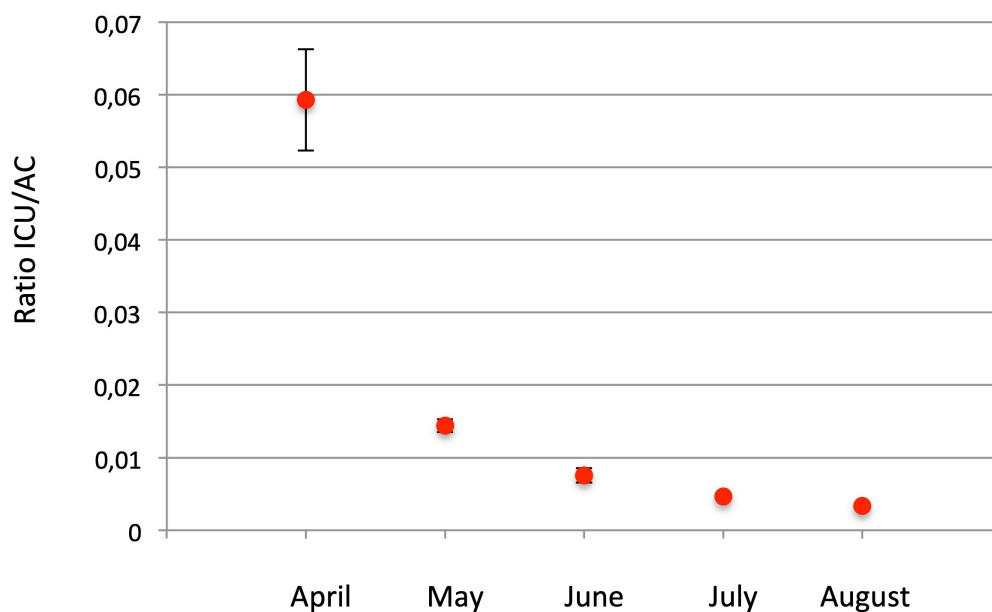

336  
337 **Fig.1a** Ratio between ICU occupation and active cases in each month, from April to August. Error  
338 bars are as in table 1 (statistical errors at 95% probability level, i.e. two standard deviations).  
339

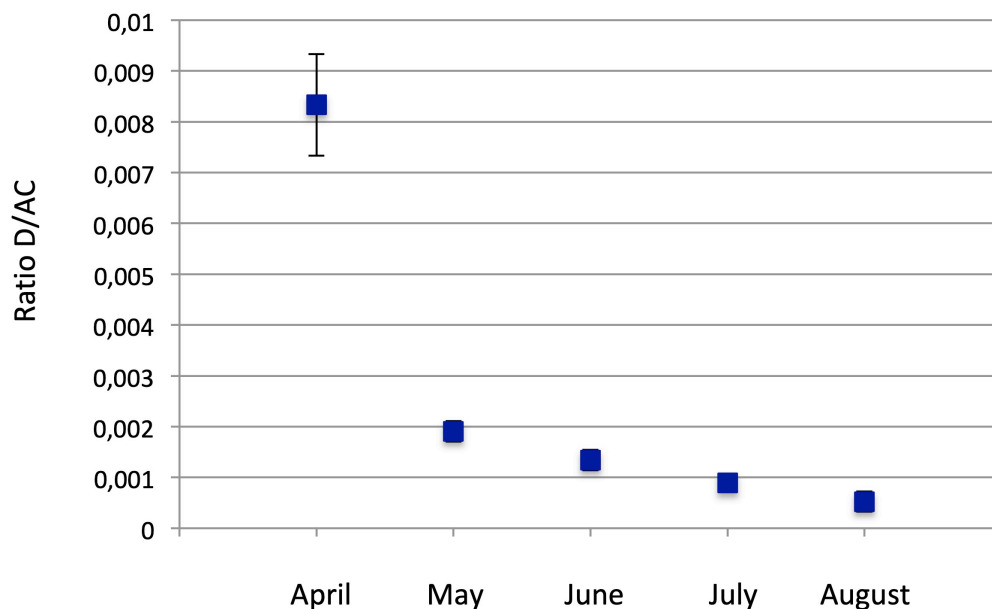

340  
341 **Fig.1b** Ratio between deaths and active cases in each month, from April to August. Error bars are  
342 as in table 1 (statistical errors at 95% probability level, i.e. two standard deviations).  
343



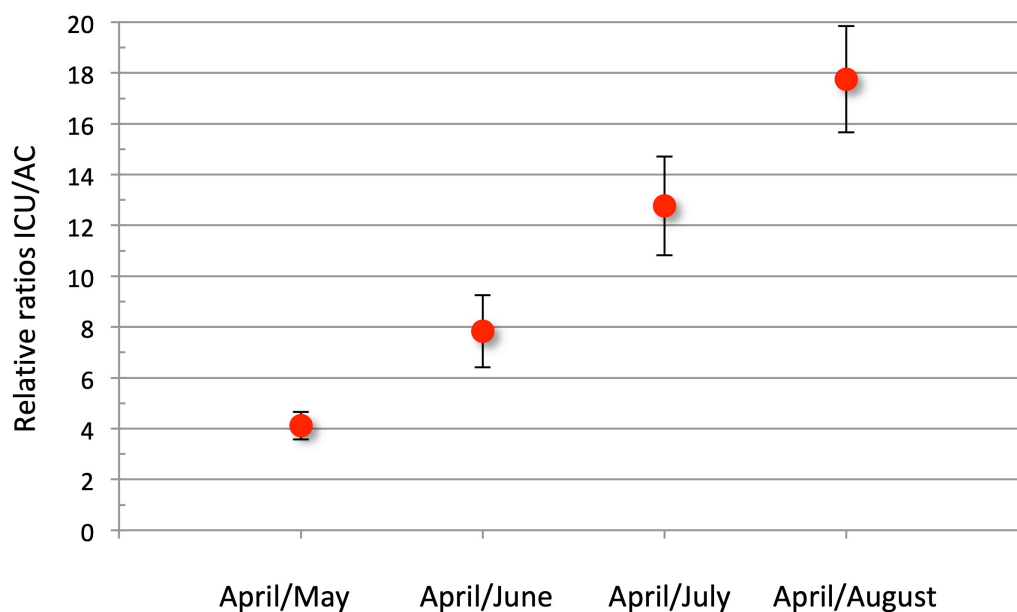

344  
345 **Fig.2a** Relative ratios of ICU/AC in April, with respect to the following months May to August.  
346 Error bars are as in table 1 (statistical errors at 95% probability level, i.e. two standard deviations).  
347

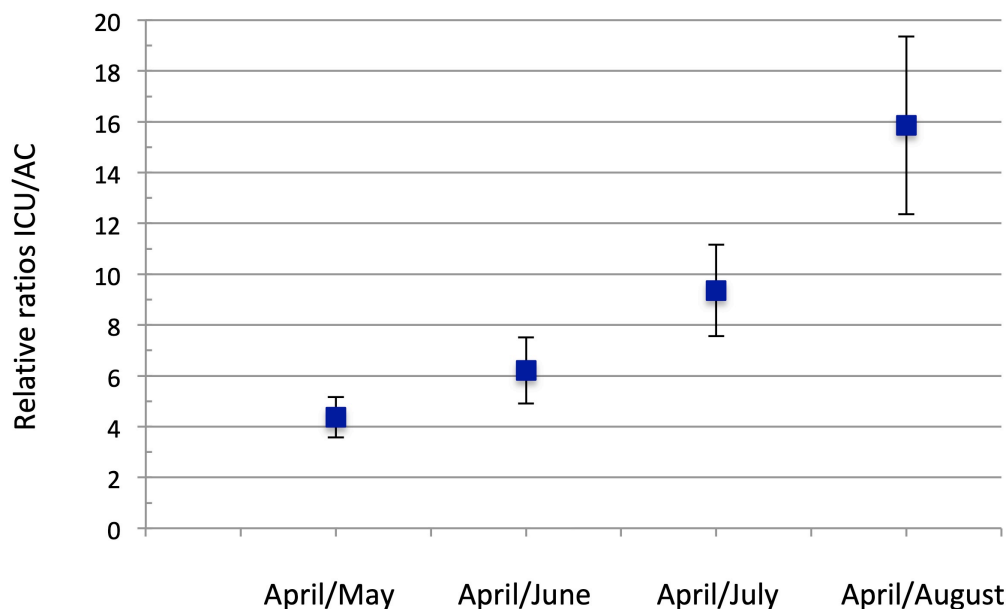

348  
349 **Fig.2b** Relative ratios of D/AC in April, with respect to the following months May to August. Error  
350 bars are as in table 1 (statistical errors at 95% probability level, i.e. two standard deviations).
